# Supplementary material for: Hydrogenated or oxyfunctionalized turpentine: options for automotive fuel components
Source: Royal Society of Chemistry journal article supplement (doi:10.1039/d1ra03003e), 2021-01-01
Supplement: d1ra03003e1.pdf [file d1ra03003e1.pdf]

## Hydrogenated or oxyfunctionalized turpentine: Options for automotive fuel components.

David Donoso<sup>1</sup>, Duban García<sup>2</sup>, Rosario Ballesteros<sup>1</sup>, Magín Lapuerta<sup>1\*</sup>, Laureano Canoira<sup>3</sup>.

<sup>1</sup>ETS Ingeniería Industrial. Universidad de Castilla-La Mancha. Avda. Camilo José Cela s/n, 13071 Ciudad Real, Spain.

<sup>2</sup>Environmental Catalysis Research Group, School of Engineering, Chemical Engineering Department, Universidad de Antioquia. Calle 70 No. 52-21, Medellín, Colombia.

<sup>3</sup>Department of Energy & Fuels, ETS Ingenieros de Minas y Energía, Universidad Politécnica de Madrid. Ríos Rosas 21, 28003 Madrid, Spain.

\*Corresponding Author: Magin.Lapuerta@uclm.es

### Supplementary material

**Table 1S.** Elemental composition from GC-MS and estimated properties of turpentine, hydroturpentine and oxyturpentine

|    | <b>C</b><br>(% w/w) | <b>H</b><br>(% w/w) | <b>O</b><br>(% w/w) | <b>Mean</b><br><b>molecular</b><br><b>formula</b>       | <b>Molecular</b><br><b>weight</b><br><b>(kg/kmol)</b> | <b>H/C</b><br><b>ratio</b> | <b>Fuel/air</b><br><b>stoichiometric</b><br><b>ratio</b> |
|----|---------------------|---------------------|---------------------|---------------------------------------------------------|-------------------------------------------------------|----------------------------|----------------------------------------------------------|
| T  | 88.1                | 11.8                | 0.1                 | C <sub>10.19</sub> H <sub>16.30</sub> O <sub>0.00</sub> | 138.85                                                | 1.60                       | 1/14.20                                                  |
| HT | 87.4                | 12.2                | 0.4                 | C <sub>10.16</sub> H <sub>16.88</sub> O <sub>0.03</sub> | 139.64                                                | 1.66                       | 1/14.21                                                  |
| OT | 84.7                | 11.5                | 3.8                 | C <sub>10.33</sub> H <sub>16.75</sub> O <sub>0.35</sub> | 146.55                                                | 1.62                       | 1/13.48                                                  |

**Table 2S.** Measured properties of fuels

| <i>Fuel</i> | <i>Density<br/>(kg/m<sup>3</sup>)</i> | <i>Kinematic<br/>viscosity at<br/>40°C<br/>(mm<sup>2</sup>/s)</i> | <i>WSD<br/>(µm)</i> | <i>Higher<br/>heating<br/>value<br/>(MJ/kg)</i> | <i>Lower<br/>heating<br/>value<br/>(MJ/kg)</i> | <i>Flash<br/>point (°C)</i> | <i>Derived<br/>cetane<br/>number</i> | <i>SP (mm)</i> | <i>OESI</i> | <i>Cloud point<br/>(°C)</i> | <i>Pour point<br/>(°C)</i> | <i>COT (°C)</i> |
|-------------|---------------------------------------|-------------------------------------------------------------------|---------------------|-------------------------------------------------|------------------------------------------------|-----------------------------|--------------------------------------|----------------|-------------|-----------------------------|----------------------------|-----------------|
| T           | 864.3 ± 0.9                           | 1.35 ± 0.00                                                       | 461 ± 11            | 44.9 ± 0.0                                      | 42.3 ± 0.0                                     | 37.3 ± 1.2                  | 19.9 ± 0.5                           | 9.0 ± 0.0      | 53.7 ± 0.0  | -104.1 ± 3.4                | -101.7 ± 2.9               | <-90.0          |
| HT          | 861.7 ± 0.5                           | 1.47 ± 0.00                                                       | 360 ± 6             | 45.1 ± 0.1                                      | 42.5 ± 0.1                                     | 33.2 ± 0.6                  | 23.1                                 | 10.7 ± 0.6     | 44.4 ± 3.0  | n.d.                        | n.d.                       | <-90.0          |
| OT          | 912.6 ± 0.0                           | 3.51 ± 0.01                                                       | 302 ± 42            | 42.2 ± 0.1                                      | 39.7 ± 0.1                                     | 37.0                        | 19.8                                 | 33.3 ± 0.6     | 8.0 ± 0.6   | n.d.                        | -94.8 ± 0.8                | <-90.0          |
| D           | 826.6 ± 0.6                           | 2.59 ± 0.01                                                       | 429 ± 55            | 45.8 ± 0.1                                      | 43.1 ± 0.1                                     | 74.0 ± 0.0                  | 59.9                                 | 23.0 ± 0.6     | 26.0 ± 0.9  | -22.7 ± 0.0                 | -22.0 ± 0.0                | -27.0 ± 0.1     |
| B           | 875.8 ± 1.0                           | 4.53 ± 0.05                                                       | 174 ± 7             | 39.7 ± 0.6                                      | 37.1 ± 0.6                                     | 137.8 ± 1.2                 | 59.3                                 | n.d.           | n.d.        | 7.0 ± 0.0                   | 10.0 ± 0.0                 | 2.0 ± 0.0       |

n.d. not detected

**Table 3S.** Measured properties of blends of turpentine, hydroturpentine and oxyturpentine with diesel

| <i>Blend with diesel (% in v/v)</i> | <i>Density (kg/m<sup>3</sup>)</i> | <i>Kinematic viscosity at 40°C (mm<sup>2</sup>/s)</i> | <i>WSD (µm)</i> | <i>Higher heating value (MJ/kg)</i> | <i>Lower heating value (MJ/kg)</i> | <i>Flash point (°C)</i> | <i>Derived cetane number</i> | <i>SP (mm)</i> | <i>OESI</i> | <i>Cloud point (°C)</i> | <i>Pour point (°C)</i> | <i>COT (°C)</i> |
|-------------------------------------|-----------------------------------|-------------------------------------------------------|-----------------|-------------------------------------|------------------------------------|-------------------------|------------------------------|----------------|-------------|-------------------------|------------------------|-----------------|
| T (1%)                              | 827.0 ± 0.5                       | 2.54 ± 0.01                                           | 399 ± 3         | 45.8 ± 0.0                          | 43.0 ± 0.0                         | 71.8 ± 0.6              | 59.8                         | 22.6 ± 0.6     | 26.3 ± 0.9  | -25.3 ± 0.6             | -22.0 ± 0.0            | -27.9 ± 0.0     |
| T (2%)                              | 828.0 ± 0.7                       | 2.58 ± 0.01                                           | 390 ± 5         | 45.8 ± 0.0                          | 43.0 ± 0.0                         | 70.8 ± 1.3              | 58.6                         | 22.0 ± 0.6     | 27.2 ± 1.0  | -25.4 ± 0.1             | -22.0 ± 0.0            | -28.3 ± 0.1     |
| T (3%)                              | 828.3 ± 0.4                       | 2.51 ± 0.01                                           | 398 ± 17        | 45.8 ± 0.0                          | 43.0 ± 0.0                         | 68.5 ± 0.0              | 58.3                         | 21.6 ± 0.6     | 27.6 ± 1.0  | -25.7 ± 0.1             | -22.7 ± 0.6            | -28.3 ± 0.1     |
| T (5%)                              | 829.0 ± 0.4                       | 2.47 ± 0.01                                           | 435 ± 52        | 45.8 ± 0.0                          | 43.0 ± 0.0                         | 65.2 ± 0.6              | 57.6                         | 20.6 ± 0.6     | 29.1 ± 1.1  | -25.6 ± 0.0             | -23.0 ± 0.0            | -28.9 ± 0.0     |
| T (10%)                             | 829.7 ± 0.3                       | 2.42 ± 0.00                                           | 441 ± 3         | 45.7 ± 0.0                          | 43.0 ± 0.0                         | 60.5 ± 0.0              | 54.4                         | 19.6 ± 0.6     | 30.3 ± 1.2  | -26.0 ± 0.0             | -23.7 ± 0.6            | -29.7 ± 0.1     |
| T (15%)                             | 831.4 ± 0.7                       | 2.32 ± 0.00                                           | 446 ± 75        | 45.7 ± 0.0                          | 43.0 ± 0.0                         | 55.5 ± 0.1              | 51.6                         | 18.9 ± 0.6     | 30.9 ± 1.3  | -26.3 ± 0.2             | -24.3 ± 1.2            | -30.1 ± 0.2     |
| T (20%)                             | 834.3 ± 1.1                       | 2.29 ± 0.01                                           | 445 ± 43        | 45.6 ± 0.0                          | 42.9 ± 0.0                         | 46.5 ± 0.6              | 49.9                         | 18.6 ± 0.6     | 30.8 ± 1.2  | -26.7 ± 0.1             | -25.3 ± 0.6            | -31.0 ± 0.0     |
| HT (1%)                             | 831.6 ± 0.3                       | 2.48 ± 0.01                                           | 367 ± 24        | 46.0 ± 0.1                          | 43.2 ± 0.1                         | 73.5 ± 0.0              | n.m.                         | 23.0 ± 0.6     | 25.7 ± 0.9  | -28.7 ± 0.3             | -28.3 ± 0.6            | -37.5 ± 0.1     |
| HT (2%)                             | 831.7 ± 0.8                       | 2.54 ± 0.04                                           | 366 ± 57        | 46.0 ± 0.0                          | 43.2 ± 0.0                         | 74.0 ± 0.0              | 51.2                         | 22.6 ± 0.6     | 26.1 ± 0.9  | -31.3 ± 2.5             | -28.3 ± 0.6            | -37.7 ± 0.2     |
| HT (3%)                             | 832.9 ± 0.4                       | 2.63 ± 0.04                                           | 352 ± 22        | 46.0 ± 0.0                          | 43.3 ± 0.0                         | 71.0 ± 0.0              | n.m.                         | 22.6 ± 0.6     | 25.9 ± 0.9  | -29.2 ± 0.3             | -29.0 ± 0.0            | -37.8 ± 0.0     |
| HT (5%)                             | 833.0 ± 0.1                       | 2.47 ± 0.02                                           | 363 ± 29        | 46.0 ± 0.1                          | 43.2 ± 0.1                         | 68.3 ± 0.6              | n.m.                         | 22.3 ± 0.0     | 26.2 ± 0.0  | -29.4 ± 0.1             | -29.0 ± 0.0            | -38.2 ± 0.0     |
| HT (10%)                            | 834.8 ± 0.4                       | 2.40 ± 0.06                                           | 440 ± 18        | 45.9 ± 0.0                          | 43.2 ± 0.0                         | 62.0 ± 0.0              | 48.6                         | 22.0 ± 0.6     | 26.0 ± 0.9  | -31.3 ± 1.1             | -31.0 ± 0.0            | -39.1 ± 0.1     |
| HT (15%)                            | 834.9 ± 0.4                       | 2.26 ± 0.01                                           | 400 ± 8         | 46.0 ± 0.0                          | 43.2 ± 0.0                         | 58.0 ± 0.0              | 49.3                         | 20.3 ± 0.0     | 28.2 ± 0.0  | -31.4 ± 0.6             | -34.0 ± 0.0            | -40.1 ± 0.1     |
| HT (20%)                            | 836.6 ± 0.2                       | 2.23 ± 0.01                                           | 463 ± 7         | 45.8 ± 0.0                          | 43.1 ± 0.0                         | 55.0 ± 0.0              | n.m.                         | 18.6 ± 0.6     | 30.8 ± 1.2  | -32.6 ± 3.5             | -36.0 ± 0.0            | -41.0 ± 0.0     |
| OT (1%)                             | 830.5 ± 0.8                       | 2.44 ± 0.00                                           | 237 ± 0         | n.m.                                | n.m.                               | n.m.                    | n.m.                         | n.m.           | n.m.        | -22.8 ± 0.0             | n.m.                   | -28.4 ± 0.0     |
| OT (2%)                             | 831.4 ± 0.0                       | 2.43 ± 0.00                                           | 202 ± 1         | n.m.                                | n.m.                               | n.m.                    | n.m.                         | n.m.           | n.m.        | -22.9 ± 0.1             | n.m.                   | -28.5 ± 0.0     |
| OT (3%)                             | 831.5 ± 0.4                       | 2.46 ± 0.00                                           | 260 ± 0         | n.m.                                | n.m.                               | 77.0                    | n.m.                         | n.m.           | n.m.        | -22.9 ± 0.0             | n.m.                   | -28.6 ± 0.0     |
| OT (5%)                             | 834.3 ± 0.1                       | 2.42 ± 0.00                                           | 197 ± 16        | n.m.                                | n.m.                               | 74.0                    | 61.8                         | n.m.           | n.m.        | -23.2 ± 0.0             | -20.4                  | -28.7 ± 0.0     |
| OT (10%)                            | 838.3 ± 0.8                       | 2.43 ± 0.00                                           | 305 ± 27        | 44.8 ± 0.3                          | 42.1 ± 0.3                         | 69.0                    | 58.1                         | 24.7 ± 0.8     | 21.7 ± 0.8  | -23.9 ± 0.2             | -21.2                  | -29.1 ± 0.0     |
| OT (15%)                            | 843.3 ± 0.3                       | 2.45 ± 0.00                                           | 308 ± 15        | n.m.                                | n.m.                               | 65.0                    | 54.4                         | n.m.           | n.m.        | -24.5 ± 0.3             | -21.9                  | -29.5 ± 0.0     |
| OT (20%)                            | 846.6 ± 0.5                       | 2.48 ± 0.00                                           | 341 ± 35        | 44.6 ± 0.1                          | 41.9 ± 0.1                         | 63.0                    | 51.7                         | 25.3 ± 0.6     | 19.8 ± 0.6  | -25.2 ± 0.1             | -22.2                  | -29.9 ± 0.0     |

n.m. not measured

**Table 4S.** Measured properties of blends of turpentine, hydroturpentine and oxyturpentine with biodiesel

| <i>Blend with biodiesel (% in v/v)</i> | <i>Density (kg/m<sup>3</sup>)</i> | <i>Kinematic viscosity at 40°C (mm<sup>2</sup>/s)</i> | <i>WSD (µm)</i> | <i>Higher heating value (MJ/kg)</i> | <i>Lower heating value (MJ/kg)</i> | <i>Flash point (°C)</i> | <i>Derived cetane number</i> | <i>SP (mm)</i> | <i>OESI</i> | <i>Cloud point (°C)</i> | <i>Pour point (°C)</i> | <i>COT (°C)</i> |
|----------------------------------------|-----------------------------------|-------------------------------------------------------|-----------------|-------------------------------------|------------------------------------|-------------------------|------------------------------|----------------|-------------|-------------------------|------------------------|-----------------|
| T (1%)                                 | 875.7 ± 0.4                       | 4.46 ± 0.01                                           | 176 ± 5         | 39.8 ± 0.0                          | 37.2 ± 0.0                         | 110.3 ± 1.2             | 59.9                         | n.d.           | n.d.        | 6.7 ± 0.2               | 9.0 ± 0.0              | 1.7 ± 0.1       |
| T (2%)                                 | 875.1 ± 0.3                       | 4.35 ± 0.01                                           | 173 ± 4         | 39.9 ± 0.0                          | 37.3 ± 0.0                         | 100.7 ± 1.3             | 59.4                         | n.d.           | n.d.        | 6.5 ± 0.1               | 7.3 ± 0.6              | 0.9 ± 0.1       |
| T (3%)                                 | 875.0 ± 0.4                       | 4.34 ± 0.01                                           | 177 ± 8         | 39.9 ± 0.0                          | 37.3 ± 0.0                         | 91.8 ± 1.0              | 58.9                         | n.d.           | n.d.        | 6.6 ± 0.1               | 7.0 ± 0.0              | 0.8 ± 0.1       |
| T (5%)                                 | 874.4 ± 0.0                       | 4.20 ± 0.01                                           | 175 ± 8         | 40.0 ± 0.1                          | 37.4 ± 0.1                         | 80.3 ± 1.5              | 58.4                         | n.d.           | n.d.        | 5.8 ± 0.1               | 7.0 ± 1.0              | 0.1 ± 0.1       |
| T (10%)                                | 873.9 ± 0.2                       | 4.03 ± 0.02                                           | 177 ± 13        | 40.2 ± 0.1                          | 37.7 ± 0.1                         | 66.3 ± 0.6              | 56.7                         | n.d.           | n.d.        | 5.1 ± 0.2               | 6.3 ± 0.6              | -1.0 ± 0.1      |
| T (15%)                                | 873.4 ± 0.2                       | 3.68 ± 0.01                                           | 177 ± 5         | 40.5 ± 0.1                          | 37.9 ± 0.1                         | 58.7 ± 0.6              | 55.4                         | n.d.           | n.d.        | 4.5 ± 0.2               | 4.3 ± 0.6              | -2.2 ± 0.1      |
| T (20%)                                | 873.3 ± 0.2                       | 3.20 ± 0.01                                           | 178 ± 0         | 40.7 ± 0.1                          | 38.1 ± 0.1                         | 55.7 ± 0.6              | 54.1                         | n.d.           | n.d.        | 3.3 ± 0.1               | 4.0 ± 0.0              | -3.3 ± 0.1      |
| HT (1%)                                | 873.3 ± 0.7                       | 4.61 ± 0.05                                           | 167 ± 5         | 40.0 ± 0.1                          | 37.5 ± 0.1                         | 117.0                   | n.m.                         | n.d.           | n.d.        | 6.8 ± 0.1               | 9.0 ± 0.0              | -0.3 ± 0.0      |
| HT (2%)                                | 872.6 ± 0.1                       | 4.53 ± 0.03                                           | 169 ± 8         | 40.0 ± 0.1                          | 37.5 ± 0.1                         | 108.0                   | 63.8                         | n.d.           | n.d.        | 6.5 ± 0.2               | 7.0 ± 0.0              | -1.3 ± 0.1      |
| HT (3%)                                | 872.3 ± 0.4                       | 4.46 ± 0.01                                           | 160 ± 10        | 40.3 ± 0.1                          | 37.7 ± 0.1                         | 95.0                    | n.m.                         | n.d.           | n.d.        | 6.8 ± 0.0               | 7.0 ± 0.0              | -1.0 ± 0.0      |
| HT (5%)                                | 872.1 ± 0.6                       | 4.37 ± 0.00                                           | 159 ± 13        | 40.1 ± 0.1                          | 37.5 ± 0.1                         | 84.0                    | n.m.                         | n.d.           | n.d.        | 6.1 ± 0.1               | 7.0 ± 0.0              | -1.7 ± 0.0      |
| HT (10%)                               | 871.9 ± 0.4                       | 4.08 ± 0.01                                           | 160 ± 4         | 40.3 ± 0.1                          | 37.7 ± 0.1                         | 68.0                    | 64.9                         | n.d.           | n.d.        | 5.6 ± 0.3               | 7.0 ± 0.0              | -1.8 ± 0.1      |
| HT (15%)                               | 870.6 ± 0.4                       | 4.01 ± 0.04                                           | 165 ± 10        | 40.7 ± 0.1                          | 38.1 ± 0.1                         | 61.0                    | 56.9                         | n.d.           | n.d.        | 4.4 ± 0.2               | 6.0 ± 0.0              | -3.6 ± 0.1      |
| HT (20%)                               | 869.5 ± 0.4                       | 3.63 ± 0.01                                           | 179 ± 11        | 40.9 ± 0.1                          | 38.3 ± 0.1                         | 56.0                    | n.m.                         | n.d.           | n.d.        | 4.2 ± 0.2               | 4.3 ± 1.5              | -5.2 ± 0.0      |
| OT (1%)                                | 878.0 ± 0.3                       | 4.20 ± 0.00                                           | 182 ± 18        | n.m.                                | n.m.                               | n.m.                    | n.m.                         | n.d.           | n.d.        | n.m.                    | n.m.                   | 1.1 ± 0.0       |
| OT (2%)                                | 877.4 ± 0.1                       | 4.18 ± 0.00                                           | 244 ± 26        | n.m.                                | n.m.                               | n.m.                    | n.m.                         | n.d.           | n.d.        | n.m.                    | n.m.                   | 0.8 ± 0.2       |
| OT (3%)                                | 877.4 ± 0.2                       | 4.20 ± 0.01                                           | 245 ± 29        | n.m.                                | n.m.                               | 100.0                   | n.m.                         | n.d.           | n.d.        | n.m.                    | n.m.                   | -0.6 ± 0.2      |
| OT (5%)                                | 878.2 ± 0.1                       | 4.15 ± 0.01                                           | 242 ± 0         | n.m.                                | n.m.                               | 92.0                    | 55.6                         | n.d.           | n.d.        | 5.1                     | 8.1                    | -1.4 ± 0.1      |
| OT (10%)                               | 880.8 ± 0.4                       | 4.11 ± 0.03                                           | 216 ± 20        | 39.9 ± 0.1                          | 37.3 ± 0.1                         | 80.0                    | 53.4                         | n.d.           | n.d.        | 4.6                     | 7.6                    | -2.9 ± 0.0      |
| OT (15%)                               | 883.3 ± 0.1                       | 4.00 ± 0.02                                           | 227 ± 0         | n.m.                                | n.m.                               | 69.0                    | 52.1                         | n.d.           | n.d.        | 3.6                     | 6.6                    | -4.0 ± 0.1      |
| OT (20%)                               | 884.3 ± 0.1                       | 3.93 ± 0.01                                           | 238 ± 4         | 40.3 ± 0.4                          | 37.8 ± 0.4                         | 65.5                    | 50.5                         | n.d.           | n.d.        | 3.5                     | 3.5                    | -5.0 ± 0.0      |
